# Supplementary material for: The required competencies of physicians within palliative care from the perspectives of multi-professional expert groups: a qualitative study
Source: Springer Nature journal article supplement (doi:10.1186/s12904-020-00566-5), 2020-05-09
Supplement: MOESM1 [file 17967410]

©Hökkä, Saarto & Lehto 2018

## Cover letter

Dear representative of working life,

As a part of the 'Development of Palliative Education – EduPal' project, funded by Ministry of Education and Culture, an evaluation on competence in palliative care by the working life representatives will be made. The aim in this evaluation is to achieve a description of what competences are needed when providing palliative care at the general (basic) level (A) and specialist levels (B/C) of palliative care. Based on the descriptions gained in the first evaluation, a competence description of palliative care (physician, registered nurses, licensed practical nurses) will be made and palliative care education will be developed nationally in Finland.

Your group will answer this survey anonymously and participation is voluntary. The data of this survey will be treated confidentially. The data will not be disclosed outside the research team, and individual respondents cannot be identified in the reporting of the results.

We kindly ask you, together with your group, to participate in this survey. The information you produce is important in the nationwide development of palliative care education and competencies.

Thank you.

Sincerely yours,

Minna Hökkä

Senior lecturer

Palliative nursing

Kajaani UAS

Tel.044-7157078

@:[minna.hokka@kamk.fi](mailto:minna.hokka@kamk.fi)

Juho Lehto

Clinical teacher

Palliative medicine

Tampere University

Tel. 050-4090974

@:[juho.lehto@staff.uta.fi](mailto:juho.lehto@staff.uta.fi)

Tiina Saarto

Professor

Palliative medicine

Helsinki University

Tel. 050-4270256

@:[tiina.saarto@hus.fi](mailto:tiina.saarto@hus.fi)

**A questionnaire for health care professionals on competencies of palliative and end-of-life care**

- 1. The number of your group participants is \_\_\_\_\_.**
- 2. What professional groups are represented in your group?**
  1. Physician \_\_\_\_\_
  2. Registered nurse \_\_\_\_\_
  3. Licensed practical nurse \_\_\_\_\_
  4. Other, please indicate the profession(s) \_\_\_\_\_
- 3. What are the working units of your group members? \_\_\_\_\_**  
\_\_\_\_\_
- 4. What are the required competencies of every physician in palliative care at the general (basic) level (A)?**
- 5. What are the required competencies of every registered nurse in palliative care at the general (basic) level (A)?**
- 6. What are the required competencies of every licensed practical nurse in palliative care at the general (basic) level A?**
- 7. What are the required competencies of every specialized physician in palliative care at the specialist levels (B/C)?**
- 8. What are the required competencies of every specialized registered nurse in palliative care at the specialist levels (B/C)?**
- 9. How should continuous education be provided at general (basic) level (A) to ensure the continuous development of competencies?**
- 10. How should continuous education be provided at the specialist levels (B/C) to ensure the continuous development of competencies?**
- 11. How do you see the appearing changes in competence needs of palliative and end-of-life care in the next ten years?**
- 12. What do you see as the most important development areas in palliative and end-of-life care in the next ten years?**
- 13. What do you see as the most important research areas in palliative and end-of-life care in the next ten years?**

*Many thanks for taking the time and effort in answering these questions!*
